# Supplementary material
Source: Springer Nature journal article supplement (https://www.springermedizin.de/resource/supplementary/13048_2008_3_MOESM2_ESM.pdf/9664700)

**A****SKOV3****OV4****PA1**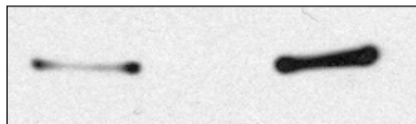**← Sialylated  $\beta_1$** **B****SKOV3****OV4****PA1**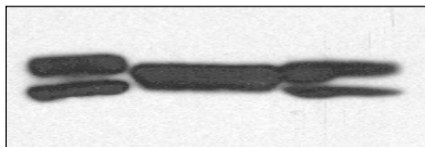**← Mature  $\beta_1$**   
**← Precursor  $\beta_1$**

Supplement: MOESM2 [file 9664700]
